# Supplementary material for: Personalized repetitive transcranial magnetic stimulation for primary progressive aphasia
Source: Research Square preprint supplement (doi:10.21203/rs.3.rs-489757/v1), 2021-05-06
Supplement: Supplementary file 1 [file 871c36692996e2f17604493d.docx]

| **Supplementary material Table S5.**  *Voxel-based brain mapping analysis results. Paired T-test. FWE-corrected p < 0.05, k = 50. Age, sex, and site of stimulation were added as covariates.* | | | | | | |
| --- | --- | --- | --- | --- | --- | --- |
| **Brain region (Brodmann area)** | **MNI coordinates** | | | **t value** | ***z* score** | **K (number of voxels)** |
| **x** | **y** | **z** |
| **ACTIVE-SITE TMS** | | | | | | |
| ***Regions with higher metabolism after treatment in comparison to baseline PET*** | | | | | | |
| **Left middle and superior temporal gyri, supramarginal gyrus, and inferior parietal lobe.** | -52 | -44 | 14 | 12.14 | 6.14 | 717 |
| -60 | -38 | 30 | 10.39 | 5.75 |
| -48 | -62 | 16 | 10.03 | 5.66 |
| **Left precuneus, and inferior and superior parietal lobe** | -20 | -70 | 46 | 11.45 | 5.99 | 531 |
| -28 | -54 | 56 | 10.16 | 5.70 |
| -40 | -48 | 46 | 9.37 | 5.49 |
| **Left and right precentral gyrus, medial frontal and superior frontal gyrus, and supplementary motor area** | -2 | -34 | 72 | 11.07 | 5.91 | 257 |
| 16 | -20 | 70 | 9.98 | 5.65 |
| **Left thalamus** | -8 | -14 | -2 | 10.94 | 5.88 | 249 |
| -12 | -40 | -4 | 9.17 | 5.44 |
| -16 | -22 | 4 | 7.98 | 5.08 |
| **Left cerebellum posterior lobe** | -38 | -70 | -22 | 10.02 | 5.66 | 783 |
| 36 | -68 | -22 | 9.82 | 5.61 |
| 12 | -76 | -22 | 9.31 | 5.47 |
| **Right and left cingulate gyrus (middle and posterior) and precuneus.** | 6 | -22 | 46 | 9.93 | 5.64 | 1437 |
| 14 | -70 | 44 | 9.85 | 5.62 |
| -2 | -56 | 54 | 9.81 | 5.61 |
| **Midbrain** | 8 | -26 | -4 | 9.52 | 5.53 | 179 |
| 16 | -34 | 0 | 9.10 | 5.42 |
| -4 | -24 | -10 | 8.92 | 5.37 |
| **Left precentral gyrus** | -22 | -24 | 64 | 9.49 | 5.52 | 57 |
| -34 | -26 | 64 | 7.52 | 4.93 |
| **Left medial frontal gyrus** | -2 | 54 | -12 | 9.45 | 5.51 | 152 |
| 8 | 46 | 10 | 7.85 | 5.04 |
| -10 | 50 | -4 | 7.34 | 4.86 |
| **Right cerebellum anterior lobe** | 18 | -40 | -18 | 9.08 | 5.41 | 110 |
| 4 | -44 | -18 | 7.73 | 5.00 |
| **Left putamen** | -24 | 16 | -8 | 9.07 | 5.41 | 104 |
| **Right precentral gyrus** | 58 | -14 | 32 | 9.04 | 5.40 | 51 |
| **Left putamen** | -28 | -10 | 6 | 8.91 | 5.36 | 112 |
| -24 | -16 | 16 | 8.01 | 5.09 |
| **Right superior and middle temporal gyri, and supramarginal gyrus** | 54 | -60 | 20 | 8.77 | 5.32 | 139 |
| 46 | -54 | 24 | 8.31 | 5.19 |
| **Left inferior frontal gyrus** | -48 | 24 | 8 | 8.65 | 5.29 | 61 |
| -42 | 24 | 2 | 7.91 | 5.06 |
| **Left medial frontal gyrus and supplementary motor area** | -2 | -14 | 58 | 8.54 | 5.25 | 69 |
| **Right lentiform nucleus** | 16 | -6 | -6 | 8.50 | 5.24 | 59 |
| **Left insula** | -42 | -8 | 14 | 8.41 | 5.22 | 56 |
| ***Regions with lower metabolism after treatment in comparison to baseline PET*** | | | | | | |
| No suprathreshold clusters. | | | | | | |
| **CONTROL-SITE TMS** | | | | | | |
| No suprathreshold clusters. | | | | | | |
