# Supplementary material for: Personalized repetitive transcranial magnetic stimulation for primary progressive aphasia
Source: Research Square preprint supplement (doi:10.21203/rs.3.rs-489757/v1), 2021-05-06
Supplement: Supplementary file 2 [file 932c6d55edfefaf13049d3cf.docx]

**Supplementary material Table S3.**

*Effects of active-site rTMS compared with baseline.*

| **Outcomes** | **Active-site rTMS**  **(n=20)** | | **p-value** | **Hedges´g**  **[CI 95%]** |
| --- | --- | --- | --- | --- |
| **Baseline** | **Post-intervention** |
| **Word count *** | 130.15 ± 88.36 | 153.45 ± 106.57 | **0.004** | 0.27  [0.10,0.46] |
| **Reading accuracy** | 699.60 ± 146.32 | 720.15 ± 100.23 | 0.21 | - |
| **Reading efficiency** | 120.74 ± 60.70 | 135.51± 64.11 | 0.31 | - |
| **Repetition of syllables *** | 6.90 ± 1.58 | 7.42 ± 0.90 | **0.03** | 0.42  [0.04,0.84] |
| **Repetition of pairs of syllables** | 6.65 ± 1.75 | 7.26 ± 1.14 | 0.09 | - |
| **Repetition of non-words** | 6.70 ± 1.45 | 6.05 ± 1.87 | 0.20 | - |
| **Repetition of sentences** | 52.30 ± 12.72 | 50.42 ± 12.43 | 0.15 | - |
| **Diadochokinetic task** | 7.94 ± 5.51 | 8.85 ± 4.34 | 0.23 | - |
| **Picture object naming** | 70.90 ± 30.51 | 70.66 ± 29.54 | 0.47 | - |
| **ACE-III** | 64.80 ± 22.93 | 62.60 ± 21.83 | 0.16 | - |
| **NPI total scores *** | 13.45 ± 16.42 | 6.95 ± 11.16 | **0.002** | 0.44  [-0.75,-0.16] |
| **Apathy *** | 2.75 ± 3.29 | 0.85 ± 1.98 | **0.009** | 0.44  [-0.82,-0.09] |
| **Depression** | 2.30 ± 4.00 | 1.05 ± 2.78 | 0.07 | 0.50  [-0.05, 0.77] |
| **Anxiety** | 1.70 ± 2.63 | 0.90 ± 2.17 | -1.29  (1.19) | - |

ACE-III: Addenbrooke’s Cognitive Examination III; CI: Confidence Interval; NPI: Neuropsychiatric Inventory. * Statistically significant mean difference.
